# Supplementary material
Source: PubMed Central journal article supplement (PMC2526555)
Supplement: NIHMS56323-supplement-01.pdf [file NIHMS56323-supplement-01.pdf]

**Supplemental Table 1 Comparison of IVIG brands between IVIG-resistant and -responsive KD patients treated in 2006\***

| <b>Brand, n (% of total)</b>           | <b>IVIG-resistant</b> | <b>IVIG-responsive</b> | <b>IVIG-resistant</b> | <b>IVIG-responsive</b> |
|----------------------------------------|-----------------------|------------------------|-----------------------|------------------------|
| <b>(Lot #)</b>                         | <b>San Diego</b>      | <b>San Diego</b>       | <b>Boston</b>         | <b>Boston</b>          |
|                                        | <b>(n=17)</b>         | <b>(n=30)</b>          | <b>(n=1)</b>          | <b>(n=24)</b>          |
| <b>IVEEGAM</b>                         | 13 (36%)              | 23 (64%)               | 1 (4%)                | 22 (96%)               |
| (VNE1A001)                             | 4 (50%)               | 4 (50%)                | 0 (0%)                | 8 (100%)               |
| (VNE1A003A)                            | 5 (50%)               | 5 (50%)                | 1 (14%)               | 6 (86%)                |
| (VNE1F003)                             | 4 (36%)               | 7 (64%)                | 0 (0%)                | 8 (100%)               |
| (Lot unknown)                          | 0 (0%)                | 7 (100%)               | N/A                   | N/A                    |
| <b>IVEEGAM &amp;</b>                   |                       |                        |                       |                        |
| <b>Gammagard liquid, 1 (2%)</b>        |                       |                        |                       |                        |
| (VNE1F003 & LE12F021AC)                | 1 (100%)              | 0 (0%)                 | N/A                   | N/A                    |
| <b>Gammagard liquid, 8 (17%)</b>       |                       |                        |                       |                        |
| (LE12CA10AD1)                          | 1 (50%)               | 1 (50%)                | N/A                   | N/A                    |
| (LE08F005AB)                           | 0 (0%)                | 4 (100%)               | N/A                   | N/A                    |
| (LE12F003AA/LE12F017AA)                | 0 (0%)                | 1 (100%)               | N/A                   | N/A                    |
| (LE12F003AA)                           | N/A                   | N/A                    | 0 (0%)                | 2 (100%)               |
| (LE12F068AB)                           | 1 (100%)              | 0 (0%)                 | N/A                   | N/A                    |
| <b>Gamunex liquid, 2 (4%)</b>          |                       |                        |                       |                        |
| (26N6P71, 26N7H2,<br>26N7JK1, 26N7981) | 0 (0%)                | 1 (100%)               | N/A                   | N/A                    |
| (26N6P71, 26N6R01)                     | 1 (100%)              | 0 (0%)                 | N/A                   | N/A                    |

\* No statistical difference was found between the number of IVIG-resistant and -responsive patients receiving Iveegam versus Gammagard or Gamunex with a Fisher's Exact test ( $P > 0.05$ )

N/A = Not Applicable

## Supplemental Table 2

### Comparison of echocardiogram results between IVIG-resistant and -responsive KD patients (1998-2006)

| Classification              | Resistant (n=60) | Responsive (n=302) | p*     |
|-----------------------------|------------------|--------------------|--------|
| <b>of Coronary Arteries</b> |                  |                    |        |
| Normal, n (%) <sup>¶</sup>  | 31 (52%)         | 193 (64%)          | NS     |
| Dilated                     | 20 (33%)         | 100 (33%)          | NS     |
| Aneurysm/ectasia            | 9 (15%)          | 9 (3%)             | 0.0008 |

<sup>¶</sup> Classification was based on the most abnormal of at least two echocardiograms per patient. The right and left anterior descending coronary arteries were classified as: Normal=z score  $\leq$  2.5 standard deviations from the mean internal diameter normalized for body surface area; Dilated = z score  $>$  2.5 but  $<$ 4.0 and returns to  $<$ 2.5 within 2 month follow-up period; Aneurysm = focal or diffuse dilatation of coronary artery segment with z score  $>$ 4.0.; Ectasia= z  $\geq$  4.0 and persists  $>$  2 months.

NS = not significant

\*Fisher's exact test

### Supplemental Table 3

#### Comparison of demographic and clinical characteristics between IVIG- resistant and - responsive KD patients

|                                | Resistant (n=60)                | Responsive (n=302)                  | p      |
|--------------------------------|---------------------------------|-------------------------------------|--------|
| Age in years *                 | 2 (0.8-3.4)<br>(range 2mo-9yrs) | 2.4 (1.2-4.2)<br>(range 2mo-14 yrs) | 0.061† |
| Illness day at diagnosis *#    | 5 (4-6)                         | 6 (5-7)                             | 0.002† |
| Males, n (%)                   | 38 (63)                         | 184 (61)                            | NS‡    |
| Ethnicity/Race, n (% of total) |                                 |                                     | NS‡    |
| Asian, n=65 (18.0%)            | 9 (13.8%)**                     | 56 (86.2%)                          |        |
| Black, n=16 (4.4%)             | 4 (25%)                         | 12 (75%)                            |        |
| Caucasian, n=99 (27.3%)        | 16 (16.2%)                      | 83 (83.8%)                          |        |
| Hispanic, n=113 (31.2%)        | 22 (19.5%)                      | 91 (80.5%)                          |        |
| AI/Alaskan, n=1 (0.3%)         | 0 (0%)                          | 1 (100%)                            |        |
| Hawaiian/PI, n=1 (0.3%)        | 0 (0%)                          | 1 (100%)                            |        |
| Mixed, n=59 (16.3%)            | 9 (15.3%)                       | 50 (84.7%)                          |        |
| Unknown, n=8 (2.2%)            | 0 (0%)                          | 8 (100%)                            |        |

*AI*, American Indian; *PI*, Pacific Islander

# Illness day at diagnosis: Illness Day 1 = the first day of fever.

\*Expressed as median (25<sup>th</sup>-75<sup>th</sup> percentiles)

NS = not significant, †Wilcoxon rank sum test , ‡Chi-square test

\*\* Number of patients with specified ethnicity/race who were IVIG-resistant or –responsive  
divided by total number of patients with that ethnicity/race
